1 Gestational pertussis vaccination and the infant's cellular immune response against  
2 whole-cell pertussis vaccine in the first year of life

3

4 Carolina Argondizo-Correia<sup>a,b,\*</sup>; Lourdes Rehder de Andrade Vaz-de-Lima<sup>b</sup>, Elaine  
5 Uchima Uehara<sup>c</sup>, Eder Gatti Fernandes<sup>d</sup>, Helena Keico Sato<sup>d</sup>, Ana Paula Sayuri Sato<sup>e</sup>,  
6 Expedito José de Albuquerque Luna<sup>a</sup>, Euclides Ayres de Castilho<sup>b</sup>, Cyro Alves de  
7 Brito<sup>a,b,#</sup>

8

9 <sup>a</sup>Institute of Tropical Medicine, University of São Paulo, São Paulo, Brazil

10 <sup>b</sup>Immunology Centre, Adolfo Lutz Institute, São Paulo, SP, Brazil

11 <sup>c</sup>Institute of Biomedical Sciences, University of São Paulo, São Paulo, Brazil

12 <sup>d</sup>CVE/CCD/SES, São Paulo, Brazil

13 <sup>e</sup>School of Public Health, University of São Paulo, São Paulo, Brazil

14

15 Running Head: Infant's pertussis cellular immune response

16

17 #Address correspondesse to Cyro Alves de Brito, [cbrito@usp.br](mailto:cbrito@usp.br)

18 \*Present address: Carolina Argondizo Correia, Laboratory of Medical Investigation 60,

19 Medical School, University of São Paulo.

20

21 Word count (abstract): 249 words

22

23 Word count (text): 2735 words

24

25 **Abstract**

26 Pertussis resurgence worldwide calls for new prevention strategies, as the recently  
27 incorporated vaccine booster dose during pregnancy, whose aim is to protect newborns  
28 from infection. In Brazil, maternal Tdap vaccination is recommended since 2014, and we  
29 reported that this strategy promotes high transplacental transfer of anti-PT IgG and it is  
30 effective in protecting infants early in life. Young children are the most susceptible group  
31 and with higher mortality rates, however, it is not well known whether the elicited anti-  
32 pertussis maternal antibodies could influence in the children's immune responses further  
33 in life, especially after their own vaccination against pertussis. Considering this scenario,  
34 we conducted a study with children born to mothers who either received or not the booster  
35 dose during pregnancy, after their primary pertussis vaccination, in order to investigate  
36 the first impact of maternal immunisation on the response to infant immunisation  
37 regarding the cellular immune response, while comparing with data from the literature.  
38 As transfer of maternal antibodies could result in attenuation of the immune response to  
39 vaccination in infants, this study performed to determine whether higher levels of  
40 maternal antibodies could influence in the immune response of infants to the whole-  
41 pertussis vaccination series. Results showed no difference in cytokine production  
42 between groups, a first suggestion that maternal vaccination may not interfere with  
43 recognition and cellular response generation to vaccination. This data, together with  
44 humoral immunity and epidemiological studies, is important for the implementation of  
45 maternal immunisation strategies nationwide and will contribute to assure public policies  
46 regarding vaccination schemes.

47

48 **Importance:** Pertussis, or whooping cough, is a respiratory infectious disease caused by  
49 a bacterial agent, resulting in violent coughs and possibly death in vulnerable groups,

50 such as young children and neonates. It is known that pregnant mothers transfer  
51 antibodies to their developing foetuses for protection in early life, however anti-pertussis  
52 antibodies are not highly detected in young children. Thus, a pertussis maternal  
53 vaccination was implemented to increase maternal anti-pertussis antibodies levels in  
54 pregnant women and therefore the transference to the foetus. However, maternal  
55 antibodies can also interfere in the child immune response in the first months of life. The  
56 significance of our research is in analysing the cellular immune response of children born  
57 from pertussis-vaccinated mothers, which will give a first glimpse on how maternal  
58 antibodies could modulate the child's response to pertussis in early life.

59

## 60 **Introduction**

61 Pertussis is a contagious respiratory disease caused by the *Bordetella pertussis* bacteria  
62 [1]. Despite high vaccination coverage, it remains an important public health problem, re-  
63 emerging in several countries every several years [2,3]. It has a high rate of  
64 morbimortality in young children, and estimates from the World Health Organization  
65 suggest that ~50 million pertussis cases and 300,000 deaths occurred annually, mostly in  
66 children under five years of age [4]. In Brazil, between 2010 and 2014, over 22,000 people  
67 were infected [5], most cases in children younger than 1 year of age [5,6].

68 The current childhood vaccination schedule includes three doses of the diphtheria, tetanus  
69 and whole cell pertussis vaccine, combined with *Haemophilus influenzae* b and hepatitis  
70 B (DTwP-Hib-HBV) in the first year of life, at 8, 16 and 24 weeks of age, leaving  
71 neonates without specific protection. So, a dose of tetanus, reduced diphtheria and  
72 acellular pertussis vaccine (Tdap) during pregnancy was proposed to address this  
73 immunity gap in young infants and promote a higher transplacental transfer of maternal

74 antipertussis antibodies (MatAb) to the foetus, resulting in improved protection during  
75 the neonatal period and until their own vaccination scheme is completed [7].

76 Since 2012, this has been recommended in the United States, United Kingdom and  
77 Australia [8], and since November 2014 in Brazil [9]. Recently, we have shown Tdap  
78 maternal vaccination promotes high titers of anti-PT IgG in newborn [10], also this  
79 strategy showed a vaccine effectiveness of 82.6% in protecting infants aged <8 weeks  
80 from pertussis in Brazil [11]. However, until now, little is known whether it may affect  
81 the subsequent childhood vaccination, which uses whole-cell pertussis (wP) [12], while  
82 other countries recommend the acellular pertussis (aP) version [13]. There is also a  
83 concern that in addition to promoting protection to young infants, high MatAb titres could  
84 interfere or attenuate the immune response to the primary childhood pertussis vaccination  
85 series [14–16].

86 The humoral response is not the only responsible for the protection against infection, as  
87 well as there are no correlates of protection for serological levels of antipertussis  
88 antibodies [17]. Several studies show that the cellular immune response is required for  
89 effective clearance of infection from the respiratory tract and disease prevention, through  
90 effector mechanisms mediated by IFN- $\gamma$  and IL-2, which are mostly produced by the T  
91 helper lymphocyte 1 (Th1). This cell type is described as having a more inflammatory  
92 profile, opposed to Th2 cells, characterized by the production of IL-4, IL-5 and IL-13.  
93 Some authors also relate the presence of IL-17 in the mechanism against *B.pertussis in*  
94 *vivo*, a cytokine produced by Th17 cells [18–23].

95 In light of this information, we sought to analyse the production of effector cytokines that  
96 could imply the activation of the infants' cellular immune response against *B. pertussis*  
97 antigen *in vitro*, in the context of the presence of maternal anti-pertussis antibodies.

98

## 99 **Material and Methods**

### 100 *Study Design and Participants*

101 This study included 43 children around 7 months of age, born either to mothers vaccinated  
102 during pregnancy with a Tdap boost vaccine during the third trimester of pregnancy  
103 (n=33) or mothers who did not get vaccinated (n=10). This cohort is derived from a larger  
104 cohort described elsewhere [10]. Mothers were followed up after parturition until their  
105 children received the primary pertussis vaccination series, composed by three DTwP-Hib-  
106 HBV doses (produced by Bio-Manguinhos/Fiocruz), at approximately 2, 4 and 6 months  
107 of age. The protocol was approved by the Ethics Committee from the Adolfo Lutz  
108 Institute (CAAE: 37581114.0.0000.0059).

109

### 110 *Sample Processing and In Vitro Stimulation*

111 5 mL of heparinized venous peripheral blood samples were collected by nurses from  
112 young children around one month after the third DTwP dose.

113 Samples were diluted in culture medium (RPMI 1640 [Gibco, Massachusetts/USA]  
114 supplemented with 2 g of NaHCO<sub>3</sub>, 10 mL of nonessential amino acids [Gibco], 40 mg  
115 of gentamycin and 10 mL of 200 mM L-glutamine [Sigma, Missouri/USA]). Peripheral  
116 blood mononuclear cells (PBMC) were isolated using a Ficoll-Paque Plus 1440 gradient  
117 (GE Healthcare, Uppsala/Sweden), according to the manufacturer's instructions. Cells  
118 were washed and resuspended in culture medium, counted and rested overnight (~16 h,  
119 1x10<sup>6</sup> cells/mL) in 48-well flat-bottom plates at 37°C in a 5% CO<sub>2</sub> incubator. On the  
120 following day, cells were stimulated with 2 µg/mL phytohemagglutinin (PHA) for 48 h  
121 [Sigma, Missouri/USA] or 5 µg/mL of inactivated pertussis toxoid (PT) for 120 h [kindly  
122 donated by GSK]. After culture, cells and supernatant were collected and stored at -80°C  
123 for later assays. Cell pellets were stabilized using RNAlater (Sigma) and phosphate

124 buffered saline (21.02 g of Na<sub>2</sub>HPO<sub>4</sub>, 7.16 g of NaH<sub>2</sub>PO<sub>4</sub>·H<sub>2</sub>O, 164.64 g of NaCl and  
125 reverse-osmosis H<sub>2</sub>O for 1 L) until total RNA extraction.

126

### 127 *Cytokine Detection*

128 Frozen supernatants were thawed at room temperature, and cytokines were measured  
129 using both *Cytometric Bead Array* Th1/Th2/Th17 kit (BD Biosciences, New Jersey/USA)  
130 and LEGENDplex *Human Th Cytokine Panel (13-plex)* kit (BioLegend, California/USA),  
131 according to the manufacturers' instructions, in order to compare results and analyse a  
132 larger range of cytokines. Both curve and samples were read in a BD LSRFortessa flow  
133 cytometer (BD Biosciences). Minimum detection limits were 4.88 pg/mL (BD) and 2.4  
134 pg/mL (BioLegend). Corresponding analyses were performed with FCAP Array software  
135 v3.0 (BD Biosciences) and LEGENDplex Data Analysis software (BioLegend).

136

### 137 *RNA Extraction and Quantitative Polymerase Chain Reaction (qPCR)*

138 RNA extraction was performed using Qiagen's RNeasy Mini kit (Qiagen,  
139 Hilden/Germany), following the manufacturer's instructions. To remove any traces of  
140 DNA, a DNA digestion step was performed using an RNAqueous Mini Kit (Ambion,  
141 Massachusetts/USA). RNA purity and quantity were evaluated by spectrophotometry in  
142 a Nanodrop (Thermo Scientific, Massachusetts/USA). RNA was reverse transcribed to  
143 cDNA using an iScript cDNA Synthesis Kit (Bio-Rad, California/USA) according to the  
144 manufacturer's instructions.

145 In an attempt to identify different cell types, the chosen genes were the transcription factor  
146 *RORC2* and the cytokine gene *IL17A*, representing Th17 cells, the transcription factor  
147 *GATA3* and the cytokine gene *IL4* representing Th2 cells, and the cytokines *IFNG* for  
148 Th1 and *IL10* for regulatory response [24]. qPCR assays were run for each sample

149 containing cDNA as a template, specific forward (5'-3') and reverse (5'-3') primers,  
150 respectively:

151 *RORC2*: TGGAAGTGGTGCTGGTTAGGA/AAGGCTCGGAACAGCTCCAT;

152 *GATA3*: AGATGGCACGGGACACTACCT/TAATTCGGGTTTCGCTTCCG;

153 *IFNG*:

154 GTTTTGGGTTCTCTTGGCTGTTA/AAAAGAGTTCCATTATGCGCTACATC;

155 *IL17A*: GACTCCTGGGAAGACCTCATTGG/CTTGTCCTCAGAATTTGGGCATCC;

156 *IL4*: ACAGCCTCACAGAGCAGAAGACT/TGTTCTTGGAGGCAGCAAAGA;

157 *IL10*: CAGGGCACCCAGTCTGAGAA/CACATGCGCCTTGATGTCTG;

158 *GAPDH*: GAAGGTGAAGGTCGGAGT/GAAGATGGTGATGGGATTTCCA;

159 and SYBR Green PCR Master Mix (Life Technologies, Massachusetts/USA) on an  
160 Applied Biosystems 7500 Real-Time PCR System (Applied Biosystems,  
161 California/USA). *GAPDH* gene expression was used as a control to normalize the data.  
162 Results were represented as fold change given by the equation described by Livak and  
163 Schmittgen [25].

164

### 165 *Statistical Analysis*

166 Descriptive and inferential statistical analyses were performed with GraphPad Prism  
167 software (version 5.0). Nonparametric Mann-Whitney, Kruskal-Wallis, Friedman, Dunn  
168 and Wilcoxon tests were used for inter- and intragroup analyses, and Spearman's  
169 correlation coefficient was used for demographic and experimental data. We used  $\alpha=5\%$ ,  
170 95% confidence interval, level of significance=5% and 2-sided tests.

171

## 172 **Results**

173 The study population consisted of young children born from women who received (VC)  
174 or not (NVC) a Tdap boost dose during pregnancy (Table 1). Samples were randomly  
175 chosen from a larger cohort described by Vaz-de-Lima et al. [10]. The groups presented  
176 a similar and representative demographic profile when compared to the larger cohort.  
177 In order to evaluate whether Tdap vaccination during pregnancy could induce  
178 modification in the cellular immune response of children, we evaluated a few related  
179 genes and cytokines that could represent the main cells in the cellular immune response,  
180 herein described as Th1, Th2 and Th17.  
181 Transcriptional profile (Figure 1) showed no difference between groups, though the  
182 median levels of *GATA3*, *IL10* and *IFNG* were higher in children born to nonvaccinated  
183 mothers. When comparing the normalized expression of both basal and stimulated  
184 condition between groups, NVCs had lower levels for the basal condition concerning  
185 *GATA3* (p=0.0279) and *IFNG* (p=0.0290) expression. In the stimulated condition, the  
186 differences disappear, so the higher median level in the fold change analysis can indicate  
187 that in order to achieve the same expression upon PT stimulation, NVCs must have a  
188 greater increase in the expression of *GATA3* and *IFNG* due to the lower basal expression.  
189 To verify whether the results found in gene expression reflected the cytokine production,  
190 cytokines from Th1, Th2 and Th17 profiles were quantified via flow cytometry (Table  
191 2). PHA stimulation was used as a positive control in a few samples for the main cytokines  
192 for the 3 Th profiles, due to samples and kit availability.  
193 In Table 2 it shown the total quantification from detectable all cytokines but IL-9 and IL-  
194 17F, as those values were undetectable.  
195 Overall, TNF, IFN- $\gamma$ , IL-13 and IL-6 were the most produced cytokines in both groups,  
196 with IL-6 being more produced in PT-stimulated cells derived from children born to



197 vaccinated mothers (VC). In contrast, IL-2 was higher in children whose mothers were  
198 not vaccinated (NVC).

199 As both groups showed simultaneous IFN- $\gamma$  and IL-13 production, which could indicate  
200 a mixed Th1/Th2 response or a good response by individuals to all cytokines, we  
201 evaluated the correlation between cytokines from different profiles, looking for a  
202 predominant response in all individuals or whether some individuals were indistinctly  
203 good responders to all T helper cell profiles (data not shown). However, no correlation  
204 was found between groups or cytokines. Individual responses were different from each  
205 other, making it challenging to find a correlation in a small group.

206 Regarding infants with higher cytokine levels, we analysed whether factors such as Tdap  
207 dose, gestational age, route of birth, infant's sex, period of DTwP vaccination and  
208 exclusive breastfeeding could influence the response deviation (data not shown), but no  
209 significant correlations were found.

210

## 211 **Discussion**

212 This study was the first to show the cellular immune response in older children, after the  
213 primary pertussis vaccination series, born to Tdap-vaccinated mothers in Brazil. Despite  
214 the use of Tdap during pregnancy was implemented in Brazil and other countries in the  
215 last few years and substantial data regarding antibody transfer and its influence on  
216 children's humoral response to vaccination [10,26–28], little is known whether this  
217 strategy could affect the infant's cellular immune response.

218 A few studies have been published recently about the influence of maternal antibodies in  
219 the neonatal humoral response, as the study made by Ibrahim et al. [29]. Women that did  
220 not receive Tdap during pregnancy but had detectable pertussis antibody levels showed  
221 that maternal antibody titres at delivery did not blunt infant vaccine response among

222 children that receive at least 2 wP doses, and the authors observed that infant antibody  
223 titres increased with increasing maternal antibody levels against all pertussis antigens. A  
224 Brazilian study found that Tdap maternal immunization yielded significantly higher anti-  
225 PT IgG levels in vaccinated mothers and their infants compared to their unvaccinated  
226 counterparts and a strong positive correlation between the anti-PT IgG levels in maternal  
227 and cord blood at delivery, but did not look for antibodies against other pertussis antigens  
228 [10].

229 Lima et al. [28] showed the same correlation regarding antibodies against other bacterial  
230 antigens, and showed for the first time the analysis of the cellular immune response in  
231 whole cord blood cells, showing IFN- $\gamma$ , IL-6, IL-10 and TNF production by neonatal cells  
232 upon stimulation with the whole inactivated *B. pertussis*, and low levels of IL-2, IL-4 and  
233 IL-17A.

234 In our study, we complemented the neonatal data by evaluating the cytokine productions  
235 in older children, with the complete primary series of vaccination against pertussis.  
236 The cytokines analysed were TNF- $\alpha$  and IL-2, which belong to a Th1 profile, in  
237 association with IFN- $\gamma$ ; IL-9 by Th9 cells, IL-4, IL-5 and IL-13, which contribute to the  
238 Th2 response profile; IL-10 is secreted by T regulatory cells and IL-17A, IL-17F, IL-21  
239 and IL-22 secreted by Th17 cells. IL-6 is an inflammatory cytokine and is important in the  
240 differentiation of Th17 cells [24].

241 We used purified PBMC stimulated with PT, for five days, as described in the literature  
242 [30]. By using PBMCs it is easier to access lymphocytes present in the samples and PT is  
243 the only specific antigen of *B. pertussis* [31], so our group decided to first run the assays  
244 with this antigen to have a first glimpse of what could have been happening, as well as,  
245 with PT, we analysed the adaptive response directly related to this stimulation. We could

246 not determine the purity of PT used in the assays, but even with other bacterial antigens  
247 present we could see cytokine production upon stimulus.

248 Despite using samples from older children, our study agrees with Lima et al. [28] in the  
249 production of IFN- $\gamma$ , IL-6 and TNF, which we found elevated in infants' samples, but not  
250 IL-10. We also found low levels of IL-4 and IL-17A, but IL-13, which is an indicative of  
251 the Th2 response and was not available in the assay the authors performed, was found  
252 elevated in our samples. In all cytokines evaluated, there was one or more individuals that  
253 we did not detect any production, indicating a strong variability amongst human samples.  
254 As our both groups presented similar characteristics, the slight difference in gene  
255 expression could suggest modulation by vaccination. Even so, samples were limited, and  
256 the mRNA analysed was just to have a glimpse of what cells populations may have been  
257 present upon stimulus. Even though cytokine mRNA are produced earlier under these  
258 experimental conditions, the presence of the genes can show a tendency to a certain  
259 profile. This is seen in both the cytokine measurement and gene expression and could be  
260 complemented by the analysis of *TBX21*, the gene responsible for Th1 cell polarization  
261 [32].

262 When attempting to find correlation between different cytokines production, we found  
263 that in both groups every individual produced high levels of at least one cytokine. In the  
264 NVC group, a correlation between IFN- $\gamma$  and IL-10 could point to a balance between  
265 activation and regulation, while in the VC group the same correlation was found, as well  
266 as between and IFN- $\gamma$  and IL-13 (data not shown). This could indicate a mixed Th1/Th2  
267 profile, with IL-10 possibly balancing the production of IFN- $\gamma$  and the activation of Th1  
268 cells. In both groups, cytokine levels were variable between individuals, and thus, it is  
269 not possible to determine a predominant response pattern.

270 According to Li *et al.* [33], Th2 cells do not prevent Th1 polarization but induce their  
271 apoptosis. In addition, they also observed that IL-10 could promote Th1 cell anergy  
272 through negative regulation of accessory molecules or IL-12 in antigen-presenting cells.  
273 Even inducing protection, maternal antibodies can also interfere with the child's vaccine  
274 response, reducing the vaccine efficiency [34], leading to a decrease in the child's  
275 antibody production via immune complex formation, antigen elimination via  
276 phagocytosis or epitope masking [35]. However, immune cellular response appears to be  
277 unaffected by these mechanisms [26]. As in Brazil children are vaccinated with DTwP,  
278 unlike many countries, we aimed to analyse the cellular immune response of vaccinated  
279 children born to either vaccinated or non vaccinated women, to confirm whether the  
280 cellular response would be intact. No difference was found between the two groups.  
281 Regardless of the different sample sizes and individual variabilities, both common factors  
282 in human vaccine studies [36–38], we could see IFN- $\gamma$  and TNF- $\alpha$  production, indicative  
283 of the Th1 response, while only IL-13 from the Th2 profile was detected.  
284 Overall, this work is the first step towards a complete scenario of maternal antibodies  
285 interference in cellular immune responses. Most pertussis studies describe humoral  
286 responses, before [39] and after the implementation of maternal vaccination [40,41],  
287 evaluating immunoglobulin levels produced by mothers and transferred to newborns, in  
288 countries using aP vaccines in children, unlike Brazil. A paper in Argentina describes the  
289 use of DTwP in children in the country; however, the study shows only the influence of  
290 maternal antibodies on the humoral responses of children before DTwP vaccination  
291 [41]. Despite the limitations, we evidenced cellular immune response in the context of  
292 pertussis vaccination, which is shown to be important for protection [42]. Our results  
293 show no difference in cytokine production against a bacterial antigen between groups,  
294 regardless of maternal vaccination, and this could set the path to other works that will

295 support public health policies regarding vaccination in pregnancy. This knowledge is  
296 essential to the enhancement of vaccine protocols in pregnant women and as a basis for  
297 physicians and healthcare managers to recommend this strategy.

298

## 299 **Conclusion**

300 This work shows cytokine production against a pertussis antigen in the context of  
301 maternal antibodies, and data could be strengthened by verifying these observations with  
302 more than one pertussis antigens. Also, there are ongoing studies that measured antibody  
303 responses to infant immunisation, in order to complement data and promote discussion  
304 about a potential difference in the impact of maternal immunisation of infant cellular and  
305 humoral responses.

306

307 **Acknowledgments:** The authors would like to thank the teams at Hospital Maternidade  
308 Interlagos and Hospital Maternidade Leonor Mendes de Barros for recruitment and their  
309 help with blood specimen collection, Laboratory of Dermatology and  
310 Immunodeficiencies (LIM-56, Medical School of the University of São Paulo) and  
311 Immunology Centre from the Adolfo Lutz Institute for the infrastructure and support, the  
312 funding sources and all participants of the study. This study was supported by funding  
313 provided by the Special Health Fund for Mass Immunization and Disease Control  
314 (FESIMA) and São Paulo Research Foundation (FAPESP), grants #2015/19726-7 and  
315 #2015/16157-1. The funders had no role in study design, data collection and  
316 interpretation, or the decision to submit the work for publication. The authors also declare  
317 no conflicts of interest to disclose.

318

## 319 **References**

- 320 [1] World Health Organization. Pertussis vaccines: WHO position paper - August  
321 2015. *Weely Epidemiol Rec* 2015;90:433–60. doi:10.1371/jour.
- 322 [2] Pan American Health Organization. Epidemiological alert. Pertussis (Whooping  
323 Cough). *PAHO Bull* 2012:1–2.
- 324 [3] Luz PM, Codeço CT, Werneck GL. A reemergência da coqueluche em países  
325 desenvolvidos: um problema também para o Brasil? *Cad Saúde Pública*  
326 2003;19:1209–13.
- 327 [4] World Health Organization. WHO–recommended standards for surveillance of  
328 selected vaccine-preventable diseases. Geneva: 2003.
- 329 [5] Secretaria de Vigilância em Saúde, Ministério da Saúde. Coqueluche no Brasil:  
330 análise da situação epidemiológica de 2010 a 2014. *Bol Epidemiológico*  
331 2015;46:1–8.
- 332 [6] Rocha EL, Leite D, Camargo CH, Martins LM, Silva RSN, Martins VP, et al. The  
333 characterization of *Bordetella pertussis* strains isolated in the Central-Western  
334 region of Brazil suggests the selection of a specific genetic profile during 2012–  
335 2014 outbreaks. *Epidemiol Infect* 2017;145:1392–7.  
336 doi:10.1017/S0950268816003332.
- 337 [7] Locht C, Mielcarek N. New pertussis vaccination approaches: En route to protect  
338 newborns? *FEMS Immunol Med Microbiol* 2012;66:121–33. doi:10.1111/j.1574-  
339 695X.2012.00988.x.
- 340 [8] Centers for Disease Control and Prevention. Updated Recommendations for Use  
341 of Tetanus Toxoid, Reduced Diphtheria Toxoid, and Acellular Pertussis Vaccine  
342 (Tdap) in Pregnant Women — Advisory Committee on Immunization Practices  
343 (ACIP), 2012. *Morb Mortal Wkly Rep* 2013.
- 344 [9] Ministério da Saúde. Nota informativa sobre mudanças no calendário nacional de

- 345 vacinação para o ano de 2017. Brasília: 2016.
- 346 [10] Vaz-de-Lima LRA, Sato HK, Fernandes EG, Sato APS, Pawloski LC, Tondella  
347 ML, et al. Association between the timing of maternal vaccination and newborns'  
348 anti-pertussis toxin antibody levels. *Vaccine* 2019.  
349 doi:10.1016/j.vaccine.2019.04.079.
- 350 [11] Fernandes EG, Sato APS, Vaz-de-Lima LRA, Rodrigues M, Leite D, de Brito CA,  
351 et al. The effectiveness of maternal pertussis vaccination in protecting newborn  
352 infants in Brazil: A case-control study. *Vaccine* 2019.  
353 doi:10.1016/j.vaccine.2019.03.049.
- 354 [12] Domingues CMAS, Teixeira AM da S. Coberturas vacinais e doenças  
355 imunopreveníveis no Brasil no período 1982-2012: avanços e desafios do  
356 Programa Nacional de Imunizações. *Epidemiol e Serviços Saúde* 2013;22:9–27.  
357 doi:10.5123/S1679-49742013000100002.
- 358 [13] Noble GRGR, Bernier RHRH, Esber ECEC, Hardegree MCC, Hinman ARAR,  
359 Klein D, et al. Acellular and whole-cell pertussis vaccines in Japan. Report of a  
360 visit by US scientists. *JAMA* 1987;257:1351–6.  
361 doi:10.1001/jama.1987.03390100089032.
- 362 [14] Osborn JJ, Dancis J, Julia JF. Studies of the immunology of the newborn infant.  
363 *Pediatrics* 1952;10:339–45.
- 364 [15] Premenko-Lanier M, Hodge G, Rota P, Tamin A, Bellini W, McChesney M.  
365 Maternal antibody inhibits both cellular and humoral immunity in response to  
366 measles vaccination at birth. *Virology* 2006;350:429–32.  
367 doi:10.1016/j.virol.2006.02.029.
- 368 [16] Gall SA, Myers J, Pichichero M. Maternal immunization with  
369 tetanusdiphtheriapertussis vaccine: Effect on maternal and neonatal serum

- 370 antibody levels. *Am J Obstet Gynecol* 2011;204:334.e1-334.e5.  
371 doi:10.1016/j.ajog.2010.11.024.
- 372 [17] Cherry JD, Gornbein J, Heininger U, Stehr K. A search for serologic correlates of  
373 immunity to *Bordetella pertussis* cough illnesses. *Vaccine* 1998;16:1901–6.  
374 doi:10.1016/S0264-410X(98)00226-6.
- 375 [18] Mahon BBP, Sheahan BJ, Griffin F, Murphy G, Mills KHG. of Mice with Targeted  
376 Disruptions of Interferon-  $\gamma$  Receptor 1997;186.
- 377 [19] Ross PJ, Sutton CE, Higgins S, Allen AC, Walsh K, Misiak A, et al. Relative  
378 contribution of Th1 and Th17 cells in adaptive immunity to *Bordetella pertussis*:  
379 towards the rational design of an improved acellular pertussis vaccine. *PLoS*  
380 *Pathog* 2013;9:e1003264. doi:10.1371/journal.ppat.1003264.
- 381 [20] Barbic J, Leef MF, Burns DL, Shahin RD. Role of gamma interferon in natural  
382 clearance of *Bordetella pertussis* infection. *Infect Immun* 1997;65:4904–8.  
383 doi:10.1371/journal.ppat.1003264.
- 384 [21] Ryan M, Murphy G, Gothefors L, Nilsson L, Storsaeter J, Mills KH. *Bordetella*  
385 *pertussis* respiratory infection in children is associated with preferential activation  
386 of type 1 T helper cells. *J Infect Dis* 1997;175:1246–50. doi:10.1086/593682.
- 387 [22] Higgs R, Higgins SC, Ross PJ, Mills KHG. Immunity to the respiratory pathogen  
388 *Bordetella pertussis*. *Mucosal Immunol* 2012;5:485–500. doi:10.1038/mi.2012.54.
- 389 [23] Mills KHG. Immunity to *Bordetella pertussis*. *Microbes Infect* 2001;3:655–77.
- 390 [24] Raphael I, Nalawade S, Eagar TN, Forsthuber TG. T cell subsets and their  
391 signature cytokines in autoimmune and inflammatory diseases. *Cytokine*  
392 2015;74:5–17. doi:10.1016/j.cyto.2014.09.011.
- 393 [25] Livak KJ, Schmittgen TD. Analysis of Relative Gene Expression Data Using Real-  
394 Time Quantitative PCR and the  $2^{-\Delta\Delta CT}$  Method. *Methods* 2001;25:402–8.



- 395 doi:10.1006/meth.2001.1262.
- 396 [26] Siegrist C-A, Barrios C, Martinez X, Brandt C, Berney M, Córdova M, et al.  
397 Influence of maternal antibodies on vaccine responses: inhibition of antibody but  
398 not T cell responses allows successful early prime-boost strategies in mice. *Eur J*  
399 *Immunol* 1998;28:4138–48. doi:10.1002/(SICI)1521-4141(199812)28.
- 400 [27] Siegrist CA, Córdova M, Brandt C, Barrios C, Berney M, Tougne C, et al.  
401 Determinants of infant responses to vaccines in presence of maternal antibodies.  
402 *Vaccine* 1998;16:1409–14. doi:10.1016/S0264-410X(98)00100-5.
- 403 [28] Lima L, Molina M da GF, Pereira BS, Nadaf MLA, Nadaf MIV, Takano OA, et  
404 al. Acquisition of specific antibodies and their influence on cell-mediated immune  
405 response in neonatal cord blood after maternal pertussis vaccination during  
406 pregnancy. *Vaccine* 2019;37:2569–79. doi:10.1016/j.vaccine.2019.03.070.
- 407 [29] Ibrahim R, Ali SA, Kazi AM, Rizvi A, Guterman LB, Bednarczyk RA, et al.  
408 Impact of maternally derived pertussis antibody titers on infant whole-cell  
409 pertussis vaccine response in a low income setting. *Vaccine* 2018;36:7048–53.  
410 doi:10.1016/j.vaccine.2018.09.045.
- 411 [30] Palazzo R, Carollo M, Bianco M, Fedele G, Schiavoni I, Pandolfi E, et al.  
412 Persistence of T-cell immune response induced by two acellular pertussis vaccines  
413 in children five years after primary vaccination. *New Microbiol* 2016;39:35–47.
- 414 [31] Mattoo S, Cherry JD. Molecular pathogenesis, epidemiology, and clinical  
415 manifestations of respiratory infections due to *Bordetella pertussis* and other  
416 *Bordetella* subspecies. *Clin Microbiol Rev* 2005;18:326–82.  
417 doi:10.1128/CMR.18.2.326-382.2005.
- 418 [32] Brummelman J, Raevan RHM, Helm K, Pennings JLA, Metz B, van Eden W, et  
419 al. Transcriptome signature for dampened Th2 dominance in acellular pertussis

- 420 vaccine-induced CD4+ T cell responses through TLR4 ligation. *Sci Rep*  
421 2016;6:25064. doi:10.1038/srep25064.
- 422 [33] Li L, Lee H-HH, Bell JJ, Gregg RK, Ellis JS, Gessner A, et al. IL-4 utilizes an  
423 alternative receptor to drive apoptosis of Th1 cells and skews neonatal immunity  
424 toward Th2. *Immunity* 2004;20:429–40. doi:10.1016/S1074-7613(04)00072-X.
- 425 [34] Siegrist CA. The Challenges of Vaccine Responses in Early Life: Selected  
426 Examples. *J Comp Pathol* 2007;137:S4–9. doi:10.1016/j.jcpa.2007.04.004.
- 427 [35] Siegrist CA. Mechanisms by which maternal antibodies influence infant vaccine  
428 responses: Review of hypotheses and definition of main determinants. *Vaccine*  
429 2003;21:3406–12. doi:10.1016/S0264-410X(03)00342-6.
- 430 [36] Lee YC, Newport MJ, Goetghebuer T, Siegrist CA, Weiss HA, Pollard AJ, et al.  
431 Influence of genetic and environmental factors on the immunogenicity of Hib  
432 vaccine in Gambian twins. *Vaccine* 2006;24:5335–40.  
433 doi:10.1016/j.vaccine.2006.04.021.
- 434 [37] Newport MJ, Goetghebuer T, Weiss HA, Whittle H, Siegrist C-A, Marchant A, et  
435 al. Genetic regulation of immune responses to vaccines in early life. *Genes Immun*  
436 2004;5:122–9. doi:10.1038/sj.gene.6364051.
- 437 [38] Tan PL, Jacobson RM, Poland GA, Jacobsen SJ, Pankratz VS. Twin studies of  
438 immunogenicity-determining the genetic contribution to vaccine failure. *Vaccine*  
439 2001;19:2434–9.
- 440 [39] Marcellini V, Piano Mortari E, Fedele G, Gesualdo F, Pandolfi E, Midulla F, et al.  
441 Protection against Pertussis in Humans Correlates to Elevated Serum Antibodies  
442 and Memory B Cells. *Front Immunol* 2017;8:1–11.  
443 doi:10.3389/fimmu.2017.01158.
- 444 [40] Maertens K, Caboré RN, Huygen K, Vermeiren S, Hens N, Van Damme P, et al.

445 Pertussis vaccination during pregnancy in Belgium: Follow-up of infants until 1  
446 month after the fourth infant pertussis vaccination at 15 months of age. *Vaccine*  
447 2016;34:3613–9. doi:10.1016/j.vaccine.2016.04.066.

448 [41] Fallo AA, Neyro SE, Manonelles G V., Lara C, Hozbor D, Zintgraff J, et al.  
449 Prevalence of Pertussis Antibodies in Maternal Blood, Cord Serum, and Infants  
450 From Mothers With and Those Without Tdap Booster Vaccination During  
451 Pregnancy in Argentina. *J Pediatric Infect Dis Soc* 2016;1–7.  
452 doi:10.1093/jpids/piw069.

453 [42] van Twillert I. Cellular and humoral immunity after infection with *B. pertussis* The  
454 role of age, antigen and vaccination history. 2017.

455

456

457

458

459

460

461

462

463

464

465

466

467

468

469

470 Table 1. Information about the study groups

|                                                                            |           | <b>With<br/>Tdap</b> | <b>Without<br/>Tdap</b> |
|----------------------------------------------------------------------------|-----------|----------------------|-------------------------|
| <b>N (infants)</b>                                                         |           | 33                   | 10                      |
| Sex (%)                                                                    | Female    | 16 (49%)             | 7 (70%)                 |
|                                                                            | Male      | 17 (52%)             | 3 (30%)                 |
| Route of birth (%)                                                         | Vaginal   | 14 (42%)             | 6 (60%)                 |
|                                                                            | C-section | 20 (58%)             | 4 (40%)                 |
| Exclusive breastfeeding, median (range),<br>months                         |           | 6.2 (1.8)            | 5.7 (2.3)               |
| Mother's age at birth, mean (SD), years                                    |           | 29.9 (7.8)           | 24.3 (5.2)              |
| Mother's gestational age at vaccination,<br>mean (SD), weeks               |           | 29.6 (2.8)           | -                       |
| Mother's gestational age at birth, mean<br>(SD), weeks                     |           | 39.1 (1.7)           | 39.6 (1.2)              |
| Time gap between vaccination and birth,<br>mean (SD), weeks                |           | 9.5 (2.8)            | -                       |
| 1st DTwP dose age<br>(minimum-maximum, days)                               |           | 21-92                | 62-70                   |
| 2nd DTwP dose age<br>(minimum-maximum, days)                               |           | 99-155               | 122-194                 |
| 3rd DTwP dose age<br>(minimum-maximum, days)                               |           | 182-232              | 183-267                 |
| Time gap between 3rd dose and sample<br>collection (minimum-maximum, days) |           | 10-127               | 7-129                   |

471 DTwP: diphtheria, tetanus and whole-cell pertussis vaccine; SD: standard deviation;

472 Tdap: tetanus, diphtheria and acellular pertussis vaccine.

473

474 **Figure 1:** Cytokine expression in PT-stimulated PBMCs from infants born either from  
475 vaccinated (VC) or nonvaccinated (NVC) mothers. (A) Relative gene expression is  
476 similar in children born to Tdap-vaccinated (VC) or nonvaccinated (NVC) mothers when  
477 culturing PMBCs with PT for 120 h. Box represents variation between 25th and 75th  
478 percentiles, and whiskers represent minimum and maximum values. (B) VC presented  
479 higher basal expression of *GATA3* and *IFNG* than NVC, though differences disappear  
480 with PT stimulation for 120 h. Box represents variation between the 25th and 75th  
481 percentiles, and whiskers represent minimum and maximum values. Statistically  
482 significant differences are indicated.

483

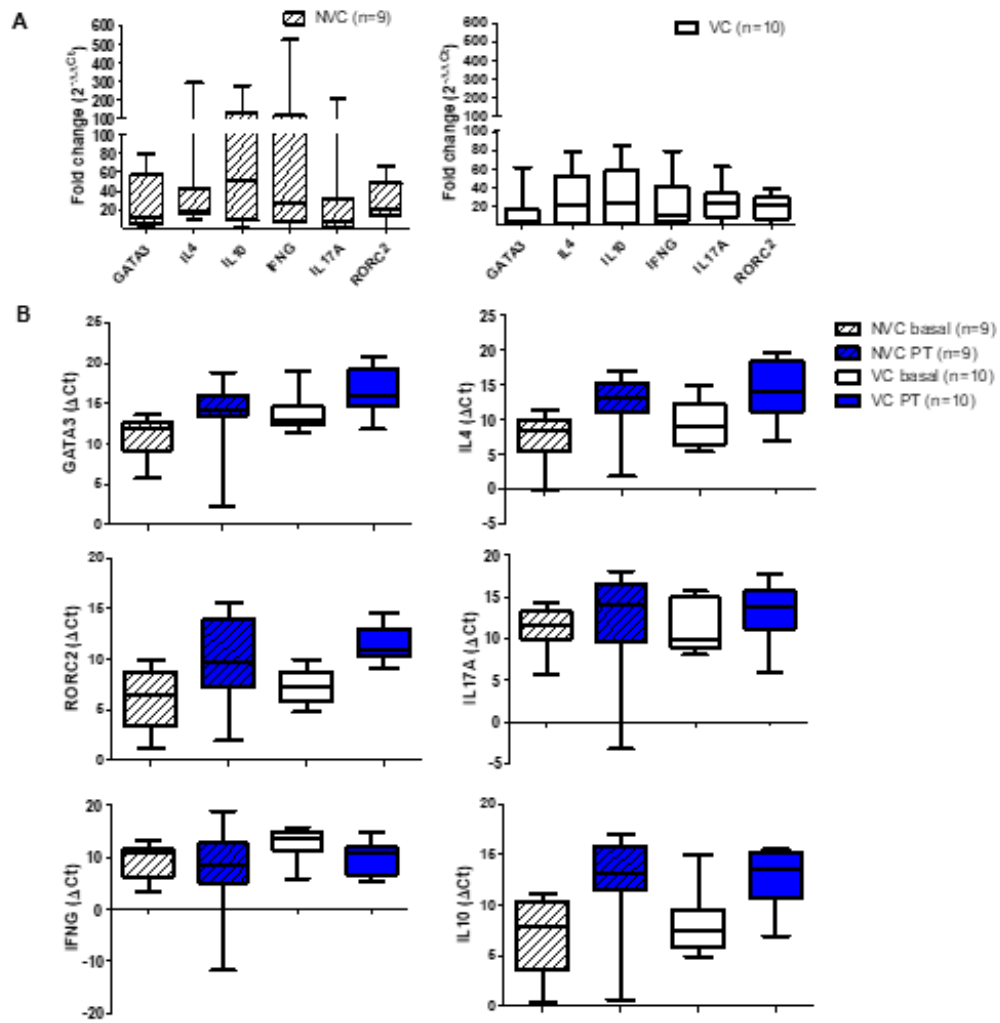

484

485

486

487

488

489

490

491

492

493

494 Table 2. Cytokine concentration in culture supernatant of peripheral blood mononuclear cells (PBMC) from infants.

| Cytokines<br>(pg/ml) | NV                     |                          |                           |                       | VC                      |                |                           |                       |
|----------------------|------------------------|--------------------------|---------------------------|-----------------------|-------------------------|----------------|---------------------------|-----------------------|
|                      | n=2<br>(-) basal 48h   | n=2<br>(+) PHA           | n=10<br>(-) basal<br>120h | n=10<br>PT            | n=4<br>(-) basal<br>48h | n=4<br>(+) PHA | n=33<br>(-) basal<br>120h | n=28/33<br>PT         |
| <b>IL-5</b>          | *                      | *                        | 0(0-0)                    | 0(0-0)                | *                       | *              | 0(0-0)                    | 3,45(0-<br>96,54)     |
| <b>IL-13</b>         | *                      | *                        | 0(0-0)                    | 775,03(0-<br>3360)    | *                       | *              | 0(0-0)                    | 725,41(0-<br>5966)    |
| <b>IL-2</b>          | 0(0-0)                 | 102,61(15,53-<br>189,68) | 1,3(0-<br>13,0)           | 430,25(0-<br>2795,84) | 0,81(0-3,24)            | 5,45(0-12,91)  | 5,57(0-<br>94,46)         | 206,27(0-<br>4174,33) |
| <b>IL-6</b>          | 29,59(14,95-<br>44,22) | *                        | 182,03(0-<br>1798)        | 245,24(0-<br>1167)    | 74,02(49,56-<br>113,11) | *              | 1.969,41(0-<br>20351)     | 2098,78(0-<br>17292)  |

|               |                     |                              |                  |                       |                         |                           |                    |                       |
|---------------|---------------------|------------------------------|------------------|-----------------------|-------------------------|---------------------------|--------------------|-----------------------|
| <b>IL-10</b>  | 1,02(0,63-<br>1,41) | 278,64(274,75-<br>282,54)    | 0,01(0-<br>0,1)  | 14,29(0-<br>71,73)    | 0,35(0-0,86)            | 35,42(10,83-<br>57,28)    | 2,03(0-<br>38,31)  | 21,57(0-<br>174,53)   |
| <b>IFN</b>    | 0,05(0,02-<br>0,08) | 2605,14(2058,35-<br>3151,94) | 0,01(0-<br>0,1)  | 799,12(0-<br>2632,72) | 0,04(0-0,08)            | 62,94(0,10-<br>248,88)    | 4,34(0-<br>127,68) | 638,10(0-<br>3633,75) |
| <b>TNF</b>    | 7,42(6,58-<br>8,25) | 2877,63(1809,63-<br>3945,63) | 0(0-0)           | 303,32(0-<br>2292)    | 5,28(1,69-<br>8,25) N=3 | 370,02(105,96-<br>948,70) | 0(0-0)             | 226,90(0-<br>2603)    |
| <b>IL-17A</b> | 3,73(0-7,45)        | 19,80(4,18-<br>35,41)        | 0,67(0-<br>6,68) | 3,85(0-<br>13,86)     | 0(0-0)                  | 5,94(0-23,76)             | 1,40(0-<br>8,58)   | 7,47(0-<br>32,02)     |
| <b>IL-4</b>   | 0,85(0,58-<br>1,12) | 3,6(1,52-5,68)               | 0,55(0-<br>1,19) | 1,1(0-<br>2,48)       | 0,63(0-1,31)            | 1,04(0-1,9)               | 0,79(0-<br>1,45)   | 1,48(0-<br>5,5)       |
| <b>IL-21</b>  | *                   | *                            | 0(0-0)           | 0(0-0)                | *                       | *                         | 0,66(0-<br>6,55)   | 1,045(0-<br>6,99)     |
| <b>IL-22</b>  | *                   | *                            | 0(0-0)           | 0,954(0-<br>9,54)     | *                       | *                         | 0,18(0-<br>5,91)   | 0(0-0)                |



495 PBMC were stimulated *in vitro* with 2  $\mu\text{L}/\text{mL}$  PHA (+) or 5  $\mu\text{g}/\text{mL}$  pertussis toxin (PT), or left unstimulated (-) for 48 h and 120 h respectively,  
496 and the supernatants collected to measure cytokine concentrations by flow cytometry. Values are presented as mean (minimum-maximum). \*  
497 Samples were not available for IL-5, IL-13, IL-21 and IL-22 quantification after PHA stimulation. NVC: children born from unvaccinated women;  
498 VC: children born from Tdap-vaccinated women; pg/mL, picogram/milliliter.
